# Supplementary material for: Source Apportionment of Chemical Elements and Their Geochemical Baseline Values in Surface Water of the Parauapebas River Basin, Southeast Amazon, Brazil
Source: MDPI journal article supplement (doi:10.3390/min12121579), 2022-12-09
Supplement: s1 [file s1]

# Supplementary Materials: Source Apportionment of Chemical Elements and Their Geochemical Baseline Values in Surface Water of the Parauapebas River Basin, Southeast Amazon, Brazil

Leandro Silva Quaresma, Gessica da Silva e Silva, Prafulla Kumar Sahoo, Gabriel Negreiros Salomão and Roberto Dall'Agnol

**Table S1.** Physicochemical parameters, anions and elements with statistical representation.

| Water Constituents                           |                               | %<DL |      | No. of Samples |     |
|----------------------------------------------|-------------------------------|------|------|----------------|-----|
|                                              |                               |      |      | <DL            |     |
|                                              |                               | R    | D    | R              | D   |
| Physico-chemical<br>Parameter                | Eletrical conductivity—EC*    | 0    | 0    | 0              | 0   |
|                                              | Dissolved oxygen—DO           | 0    | 0    | 0              | 0   |
|                                              | pH*                           | -    | -    | -              | -   |
|                                              | Total dissolved solids—TDS    | 0    | 0    | 0              | 0   |
|                                              | Turbidity                     | 0    | 0    | 0              | 0   |
|                                              | Temperature*                  | -    | -    | -              | -   |
|                                              | Redox potential*              | -    | -    | -              | -   |
| Anions and P <sub>to-</sub><br>tal           | NO <sub>3</sub> <sup>-</sup>  | 77.3 | 85.0 | 136            | 130 |
|                                              | SO <sub>4</sub> <sup>2-</sup> | 51.1 | 56.9 | 90             | 87  |
|                                              | Cl <sup>-</sup>               | 1.7  | 0.7  | 3              | 1   |
|                                              | P <sub>total</sub>            | 2.8  | 17.0 | 5              | 26  |
|                                              | F <sup>-</sup>                | 69.3 | 46.4 | 122            | 71  |
| Most abundant trace<br>elements (mg/l)       | Ca                            | 0    | 0    | 0              | 0   |
|                                              | Fe                            | 0    | 0    | 0              | 0   |
|                                              | Mg                            | 0    | 0    | 0              | 0   |
|                                              | K                             | 0    | 0    | 0              | 0   |
|                                              | Na                            | 0    | 0    | 0              | 0   |
|                                              | Mn                            | 0    | 0    | 0              | 0   |
|                                              | Al                            | 0    | 0    | 0              | 0   |
| Trace elements with lower contents<br>(µg/l) | Ba                            | 0.0  | 0.0  | 0              | 0   |
|                                              | B                             | 48.3 | 52.3 | 85             | 80  |
|                                              | Co                            | 56.8 | 68.0 | 100            | 104 |
|                                              | Cu                            | 32.4 | 24.8 | 57             | 38  |
|                                              | Cr                            | 64.2 | 78.4 | 113            | 120 |
|                                              | Sn                            | 48.9 | 24.2 | 86             | 37  |
|                                              | Sr                            | 0.0  | 0.7  | 0              | 1   |
|                                              | Ni                            | 64.2 | 73.2 | 113            | 112 |
|                                              | Rb                            | 23.3 | 47.7 | 41             | 73  |
|                                              | Ti                            | 5.1  | 6.5  | 9              | 10  |
|                                              | V                             | 47.2 | 58.2 | 83             | 89  |
|                                              | Zn                            | 21.0 | 2.0  | 37             | 3   |

Note: DL—Detection limit; R—Rainy period; D—Dry season.
